# Supplementary material for: Functional and Compositional Stability of Bacterial Metacommunities in Response to Salinity Changes
Source: PubMed Central journal article supplement (PMC5463035; doi:10.3389/fmicb.2017.00948), 2017-06-08
Supplement: Data_Sheet_1.pdf [file Data_Sheet_1.pdf]

## Supplementary Material

Mercè Berga\*, Yinghua Zha, Anna J. Székely and Silke Langenheder

\* Correspondence: merce.berga@io-warnemuende.de

### 1 Supplementary Figures and Tables

#### 1.1 Supplementary Figures

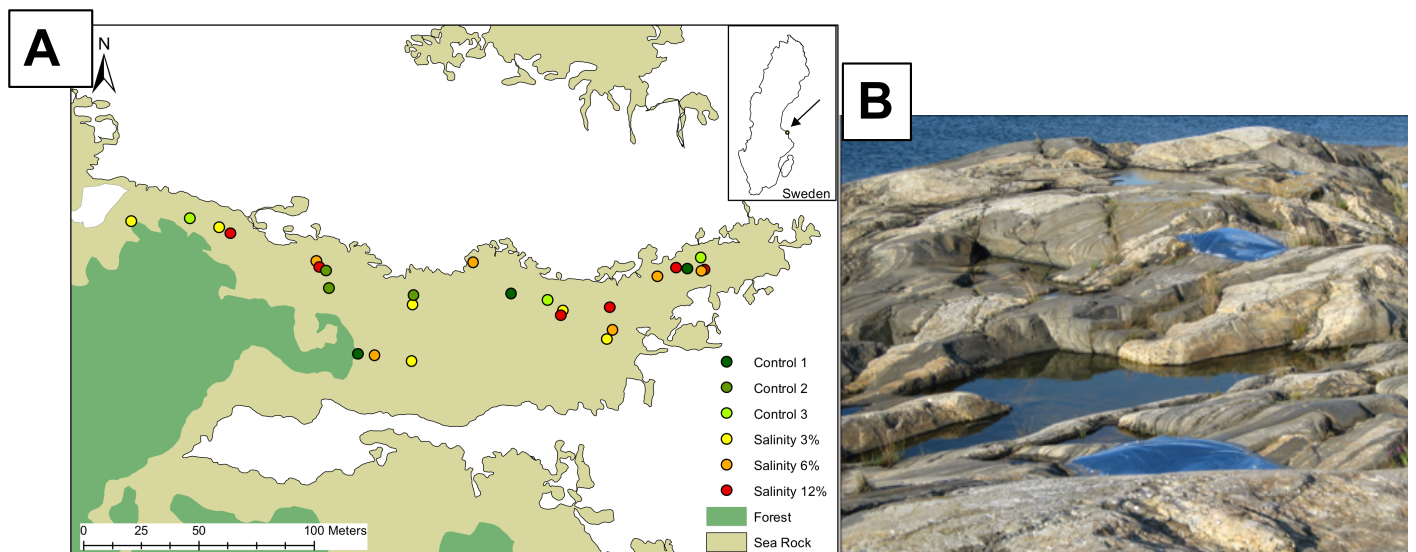

**Supplementary Figure 1.** A- Map of the area and distribution of the pools and their respective treatments. © Lantmäteriet Gävle (2010): Permission I 2010/0058. B- Picture from the rock pool area during the experiment where covered pools can be seen.

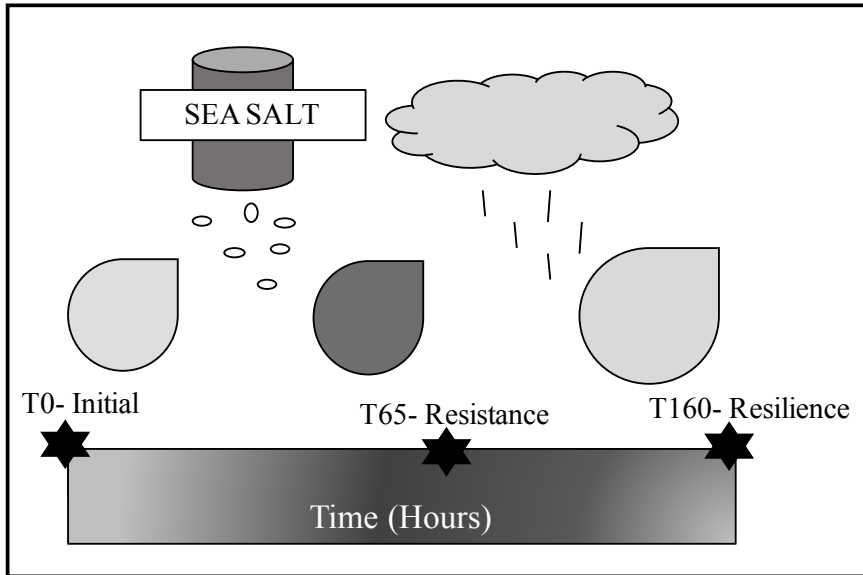

**Supplementary Figure 2.** Schematic representation of the experimental set-up.

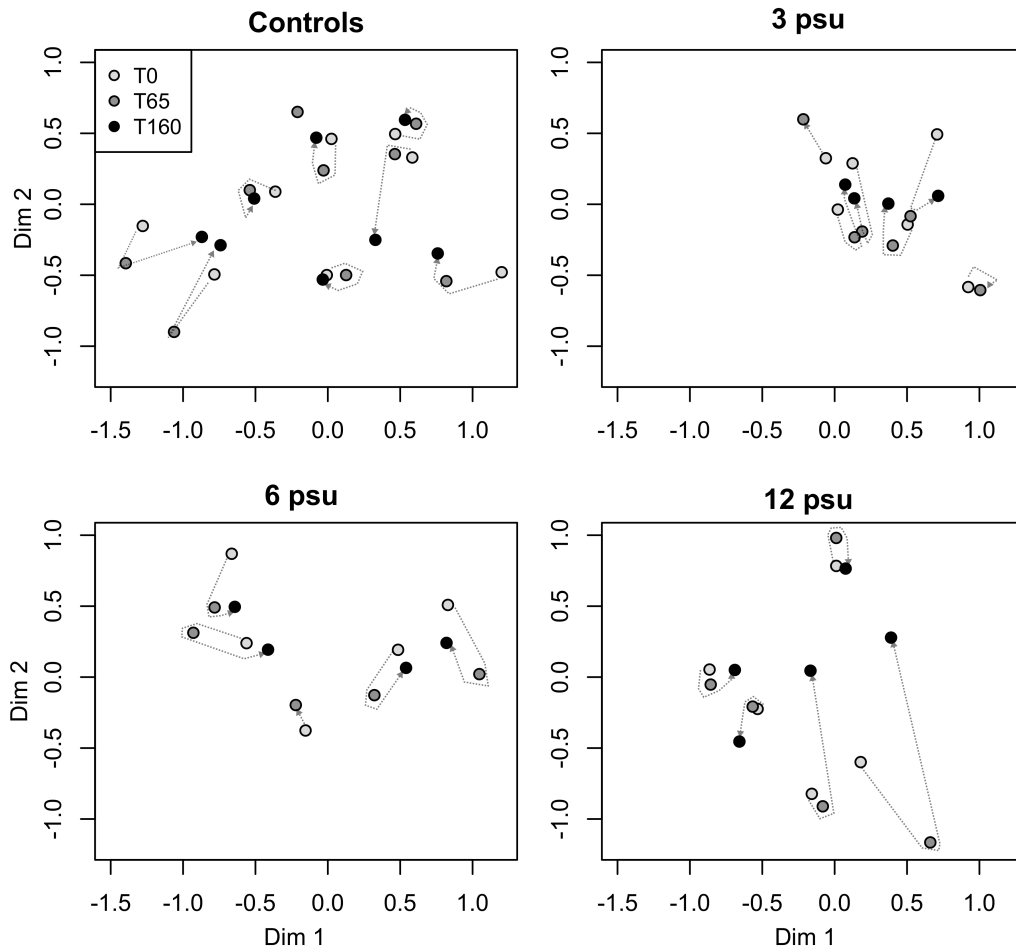

**Supplementary Figure 3.** NMDS graphs showing differences in bacterial community composition at the different time points and salinity levels. K-stress = 0.191. Discontinuous arrows indicate the shift over time.

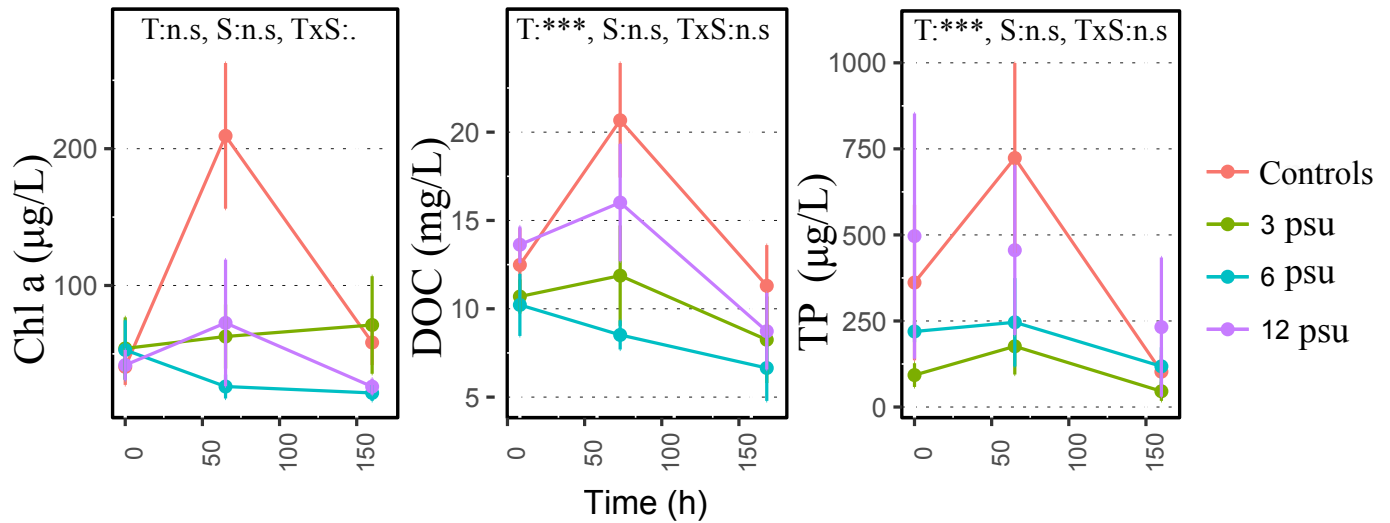

**Supplementary Figure 4.** Chlorophyll a, DOC and total phosphorus (TP) concentration at each time point in the different salinity treatments. Error bars indicate standard errors. ANOVA results are indicated as follows: T - time, S - salinity, T x S indicates the interaction. \*\*\* :  $p < 0.001$ , \*\* :  $p < 0.01$ , \* :  $p < 0.05$ , . :  $p < 0.1$  and n.s : not significant.

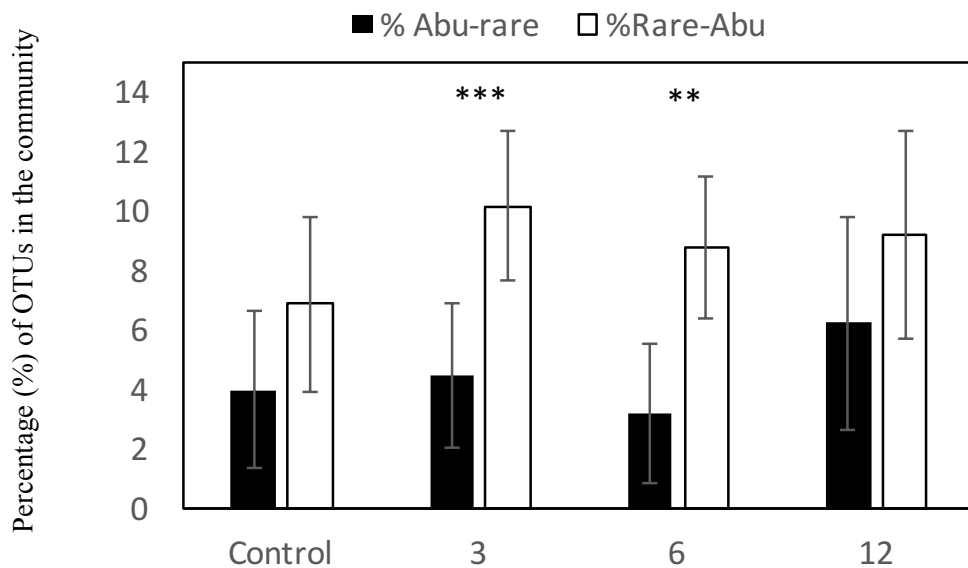

**Supplementary Figure 5.** Proportion of OTUs changing from abundant to rare and vice-versa in the pools of the different salinity treatments (3- 3 psu, 6- 6 psu and 12- 12 psu). Error bars indicate standard deviation and stars indicate the level of significance between the two categories according to a t-test: \*\*\* -  $p < 0.001$  and \*\* -  $p < 0.01$ .

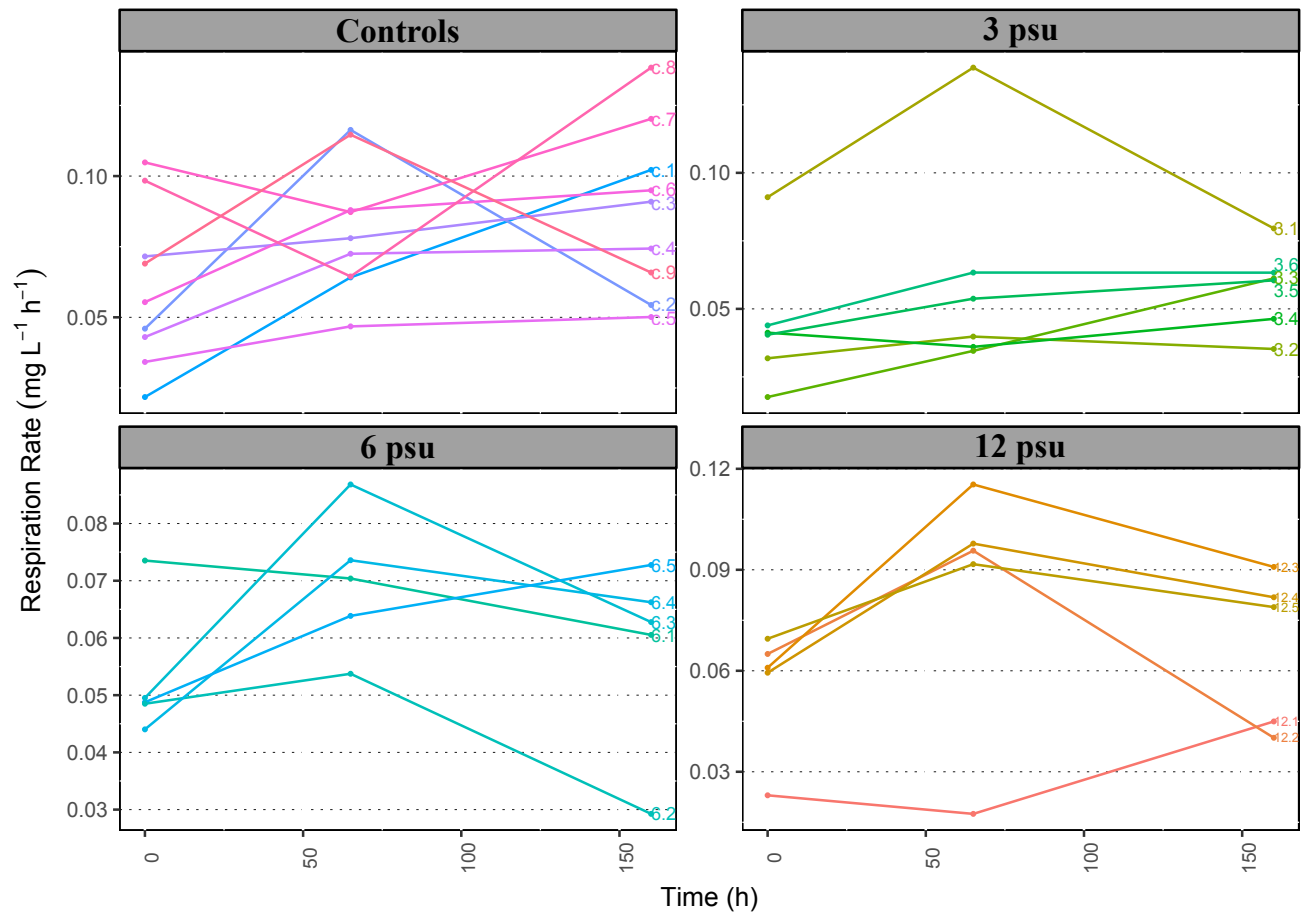

**Supplementary Figure 6.** Plots showing the variability of community respiration rates for each of the pools within each treatment over time. Each line represents a pool and the names of the pools are shown at the end of the line.

## 1.2 Supplementary Tables

**Supplementary Table 1.** Physical and environmental characteristics of the pools at the beginning of the experiment. Abbreviations: Conduct. - conductivity, Est. vol. - Estimated volume, Chl a – Chlorophyll a concentration, DOC – Dissolved organic carbon concentration, TP – Total phosphorus concentration.

| Pool  | Original Salinity | Original Conduct. | Length (cm) | Width (cm) | Depth (cm) | Est. vol. (cm <sup>3</sup> ) | Chl a (µg/L) | DOC (mg/L) | TP (µg/L) |
|-------|-------------------|-------------------|-------------|------------|------------|------------------------------|--------------|------------|-----------|
| c.1   | ofl               | 54.7              | 220         | 51         | 15         | 56100                        | 16.11        | 21.06      | 73.87     |
| c.2   | ofl               | 57.3              | 282         | 65         | 11         | 67210                        | 27.25        | 10.31      | 438.65    |
| c.3   | ofl               | 161               | 186         | 57         | 25         | 88350                        | 125.77       | 9.67       | 67.67     |
| c.4   | ofl               | 27.8              | 110         | 62         | 9.5        | 21597                        | 25.94        | 9.17       | 54        |
| c.5** | ofl               | 20.6              | 225         | 51         | 10         | 38250                        | 10.66        | 7.57       | 14.99     |
| c.6   | ofl               | 24.8              | 239         | 28         | 8          | 17845                        | 8.53         | 9.03       | 41.3      |
| c.7   | ofl               | 51.2              | 130         | 100        | 16         | 69333                        | 83.22        | 24.04      | 55.57     |
| c.8   | 0.1               | 337               | 188         | 63         | 15         | 59220                        | 48.72        | 15.11      | 2118      |
| c.9   | ofl               | 43.1              | 126         | 49         | 8          | 16464                        | 18.48        | 6.39       | 390.85    |
| 3.1   | ofl               | 55.3              | 135         | 65         | 14         | 40950                        | 146.9        | 13.24      | 205.42    |
| 3.2   | ofl               | 49.7              | 165         | 45         | 22         | 54450                        | 2.25         | 11.22      | 58.64     |
| 3.3** | ofl               | 30.3              | 263         | 102        | 18.5       | 165427                       | 33.05        | 12.96      | 22.34     |
| 3.4   | ofl               | 35.6              | 160         | 49         | 22         | 57493                        | 6.99         | 9.48       | 14.57     |
| 3.5   | NA                | NA                | 126         | 36         | 9          | 13608                        | 91.57        | 6.91       | 64        |
| 3.6** | ofl               | 45                | 212         | 206        | 9          | 131016                       | 43.12        | 10.36      | 191.75    |
| 6.1   | ofl               | 27.7              | 230         | 50         | 13         | 49833                        | 43.71        | 6.91       | 61.71     |
| 6.2   | ofl               | 22.9              | 168         | 118        | 11         | 72688                        | 120.36       | 9.03       | 54.55     |
| 6.3   | ofl               | 168               | 171         | 89         | 12         | 60876                        | 3.2          | 17.04      | 452.2     |
| 6.4** | ofl               | 39.4              | 175         | 100        | 11.5       | 67083                        | 14.66        | 9.07       | 35.76     |
| 6.5   | ofl               | 106.2             | 166         | 94         | 8.5        | 44211                        | 82.33        | 9.04       | 493.14    |
| 6.6*  | 0.1               | 334               | 104         | 40         | 14         | 19413                        | 35.07        | 9.94       | 74.29     |
| 12.1  | ofl               | 66                | 150         | 77         | 23         | 88550                        | 16.59        | 10.52      | 37.51     |
| 12.2  | ofl               | 55.5              | 170         | 80         | 12         | 54400                        | 17.65        | 16.66      | 32.51     |
| 12.3  | 140               | NA                | 185         | 64         | 9          | 35520                        | 74.4         | 12.51      | 228.24    |
| 12.4  | ofl               | 118.9             | 295         | 89         | 13         | 113772                       | 52.72        | 13.87      | 277.36    |
| 12.5  | 0.1               | 385               | 130         | 83         | 17.5       | 62942                        | 47.74        | 14.59      | 1907.4    |
| 12.6* | ofl               | 905               | 129         | 57         | 22         | 53922                        | 23.34        | 6.27       | 44.67     |

\*- Excluded from analyses because of marine infiltration during the experiment, \*\*- One or more time points might have been excluded from some analyses because of low sequences number and NA- Missing value.

**Table S2.** Results from a PerMANOVA testing the effect of volume reduction on community composition of the control treatments at the different time points. Bold values highlight p-values < 0.05.

| <b>PerMANOVA</b> |                 |                |
|------------------|-----------------|----------------|
|                  | <u>pseudo-F</u> | <u>p-value</u> |
| T0               | 1.118           | 0.238          |
| T65              | 0.999           | 0.422          |
| T160             | 1.141           | 0.205          |

**Table S3.** Results from repeated measurements ANOVAs testing effects of salinity on the abundance of the main bacterial phyla over time and depending on the salinity levels. Bold values highlight p-values < 0.05. Transf. - Data transformation applied for ANOVA test

|                       | <b>Time</b>                           | <b>Salinity</b>                    | <b>Time x Salinity</b>            | <b>Transf.</b> |
|-----------------------|---------------------------------------|------------------------------------|-----------------------------------|----------------|
| Acidobacteria         | F= 0.84,<br>p= 0.44                   | F= 0.88,<br>p= 0.47                | F= 2.06,<br>p= 0.09               | Sqrt           |
| Actinobacteria        | F= 0.30,<br>p= 0.75                   | F= 1.03,<br>p= 0.40                | F= 0.38,<br>p= 0.89               | Log            |
| Alphaproteobacteria   | <b>F= 5.06,</b><br><b>p= 0.01</b>     | F= 2.00,<br>p= 0.15                | F= 0.87,<br>p= 0.53               | Sqrt           |
| Bacilli               | <b>F=</b><br><b>25.73,</b>            | <b>F= 2.98,</b><br><b>p= 0.06</b>  | F= 1.70,<br>p= 0.16               | Log            |
| Bacteroidetes         | <b>F=17.55,</b><br><b>p&lt; 0.001</b> | F= 0.51,<br>p= 0.68                | F= 0.36,<br>p= 0.89               | Log            |
| Betaproteobacteria    | <b>F= 6.38,</b><br><b>p= 0.005</b>    | F=0.57,<br>p= 0.64                 | <b>F= 1.47,</b><br><b>p= 0.22</b> | Sqrt           |
| Deltaproteobacteria   | F= 3.04,<br>p= 0.06                   | F= 1.27,<br>p= 0.31                | F= 0.76,<br>p= 0.61               | Log            |
| Epsilonproteobacteria | <b>F=61.27,</b><br><b>p&lt; 0.001</b> | F= 2.26,<br>p= 0.11                | F= 1.52,<br>p= 0.21               | Log            |
| Flavobacteria         | F= 0.63,<br>p= 0.54                   | F= 0.74,<br>p= 0.54                | F= 1.20,<br>p= 0.33               | Sqrt           |
| Gammaproteobacteria   | <b>F=29.45,</b><br><b>p&lt; 0.001</b> | <b>F= 5.58,</b><br><b>p= 0.006</b> | <b>F= 4.17,</b><br><b>p=0.003</b> | Sqrt           |
| Gemmatimonadetes      | F= 1.45,<br>p= 0.25                   | F= 0.82,<br>p= 0.50                | F= 0.78,<br>p= 0.59               | Sqrt           |
| Oscillatoriophyceae   | F= 0.96,<br>p= 0.40                   | F= 1.34,<br>p= 0.29                | F= 1.34,<br>p= 0.27               | Sqrt           |
| Sphingobacteria       | <b>F= 7.05,</b><br><b>p= 0.003</b>    | F= 0.68,<br>p= 0.57                | F= 1.57,<br>p= 0.19               | Sqrt           |
| Synechococcophycideae | F= 0.60,<br>p= 0.56                   | F= 0.12,<br>p= 0.94                | F= 1.06,<br>p= 0.41               | Sqrt           |
| Verrucomicrobiae      | F= 0.22,<br>p= 0.80                   | F= 0.19,<br>p= 0.90                | F= 0.38,<br>p= 0.89               | Log            |



**Supplementary Table 4:** List of the most abundant OTUs (> 1% of total of reads) and their taxonomic classification in the dataset. The average change in the number of reads between T0 and T65 of pools within each salinity treatment is also shown (12 – 12 psu, 6- 6 psu, 3- 3 psu and Cont-Control). Response strategies refer to sensitive OTUs that decreased in abundance when exposed to an increasing salinity compared to their initial abundance or, alternatively, OTUs that were unaffected by the salinity change. To define a sensitive response to salinity, the average change in reads of a specific OTU were more strongly negatively affected compared to the control. OTUs were classified as either “sensitive to all salinities”, “sensitive to high salinity”, “unaffected” and “undetermined” if no clear pattern was found.

| OTU   |                                                     | 12      | 6       | 3       | Controls | Response Strategy          |
|-------|-----------------------------------------------------|---------|---------|---------|----------|----------------------------|
| 6928  | Betaproteobacteria_<br>Polynucleobacter             | -401,92 | -721,43 | -80,83  | -86,04   | Sensitive to high salinity |
| 7929  | Unclassified_bacteria                               | -25,16  | -167,06 | -150,93 | -18,40   | Undetermined               |
| 1011  | Bacteroidia_<br>Marinilabilaceae                    | -129,76 | 123,08  | 139,29  | -117,25  | Undetermined               |
| 2298  | Betaproteobacteria_<br>Comamonadaceae               | -221,54 | -55,91  | -443,24 | -43,97   | Undetermined               |
| 2426  | Betaproteobacteria_<br>Undefined<br>Burkholderiales | -98,68  | -84,25  | -123,52 | -84,2    | Undetermined               |
| 6311  | Flavobacteria_<br>Flavobacterium                    | -155,7  | -12,44  | -137,71 | 1,38     | Sensitive to salinity      |
| 587   | Bacteroidetes_<br>Spirosoma                         | -30,24  | -246,63 | -108,06 | -227,45  | Undetermined               |
| 8591  | Betaproteobacteria_<br>Comamonadaceae               | -20,44  | -36,46  | -176,51 | -52,10   | Undetermined               |
| 4005  | Flavobacteria_<br>Flavobacterium                    | -27,03  | -77,69  | -3,27   | -163,74  | Undetermined               |
| 6333  | Alphaproteobacteria_<br>Rhodobacteraceae            | -102,88 | 29,60   | 18,26   | 9,46     | Sensitive to high salinity |
| 1659  | Gammaproteobacteria_<br>Aeromonas                   | 609,62  | 107,93  | 61,74   | 18,02    | Unaffected                 |
| 4703  | Bacteroidetes_<br>Chitinophagaceae                  | -337,85 | -126,48 | -109,37 | -9,55    | Sensitive to salinity      |
| 6804  | Alphaproteobacteria_<br>Novosphingobium             | -260,82 | -24,06  | -4,76   | -85,50   | Undetermined               |
| 3698  | Bacteroidetes_<br>Cytophagaceae                     | -0,31   | 12,14   | -119,03 | -0,60    | Undetermined               |
| 10659 | Flavobacteria_<br>Chryso bacterium                  | 308,65  | 137,50  | 116,62  | 4,88     | Unaffected                 |
